# Supplementary material for: Plasma-based lipidomics reveals potential diagnostic biomarkers for esophageal squamous cell carcinoma: a retrospective study
Source: PeerJ. 2024 Apr 29;12:e17272. doi: 10.7717/peerj.17272 (PMC11064858; doi:10.7717/peerj.17272)
Supplement: Table S1 [file peerj-12-17272-s006.xlsx]

## Sheet: Sheet1
Supplemental Table S1 Prediction results of differential lipids in the test set
Lipid	Train Set		Test Set
	AUCa	Cut-off value	Accuracy	Sensitivity	Specificity	Pos Pred Value	Neg Pred Value	Precisionb	Recallc
FA 15:4	1	2.59411	0.869565	0.75	1	1	0.785714	1	0.75
FA 27:1	1	2.39695	0.956522	1	0.909091	0.923077	1	0.923077	1
FA 28:7	1	0.722942	0.956522	1	0.909091	0.923077	1	0.923077	1
FA 28:0	1	1.96952	0.956522	1	0.909091	0.923077	1	0.923077	1
FA 36:0	1	1.66526	0.913043	1	0.818182	0.857143	1	0.857143	1
FA 39:0	1	1.69623	0.956522	1	0.909091	0.923077	1	0.923077	1
FA 42:0	1	2.20532	0.956522	1	0.909091	0.923077	1	0.923077	1
FA 44:0	1	2.15319	0.956522	1	0.909091	0.923077	1	0.923077	1
DG 37:7	0.994643	2.2625	0.869565	0.833333	0.909091	0.909091	0.833333	0.909091	0.833333
FA 25:0	0.985714	2.49611	0.913043	0.916667	0.909091	0.916667	0.909091	0.916667	0.916667
SM 39:1;O2	0.976786	4.60431	0.869565	0.916667	0.818182	0.846154	0.9	0.846154	0.916667
FA 16:0;O	0.960714	3.69215	0.782609	0.916667	0.636364	0.733333	0.875	0.733333	0.916667
FA 19:1	0.944643	3.02023	0.913043	0.833333	1	1	0.846154	1	0.833333
FA 21:1	0.933929	3.63378	0.869565	1	0.727273	0.8	1	0.8	1
PI 18:0_18:1	0.933929	4.60912	0.826087	0.916667	0.727273	0.785714	0.888889	0.785714	0.916667
CAR 18:2	0.925	1.98531	0.869565	0.916667	0.818182	0.846154	0.9	0.846154	0.916667
FA 14:0	0.917857	3.88386	0.826087	0.666667	1	1	0.733333	1	0.666667
FA 27:0	0.916071	2.6244	0.913043	0.916667	0.909091	0.916667	0.909091	0.916667	0.916667
SM 30:1;O2	0.916071	2.48375	0.608696	0.833333	0.363636	0.588235	0.666667	0.588235	0.833333
SM 31:1;O2	0.910714	2.09015	0.782609	0.833333	0.727273	0.769231	0.8	0.769231	0.833333
DG 14:0_18:2	0.907143	1.64086	0.826087	0.75	0.909091	0.9	0.769231	0.9	0.75
LPC 14:0	0.901786	2.2111	0.782609	0.833333	0.727273	0.769231	0.8	0.769231	0.833333
SM 33:2;O2	0.894643	2.43197	0.782609	0.916667	0.636364	0.733333	0.875	0.733333	0.916667
FA 13:1	0.891071	3.13451	0.826087	0.916667	0.727273	0.785714	0.888889	0.785714	0.916667
SM d18:1/23:0	0.889286	6.58962	0.826087	0.75	0.909091	0.9	0.769231	0.9	0.75
SM 43:1;O2	0.880357	4.59392	0.695652	0.916667	0.454545	0.647059	0.833333	0.647059	0.916667
Cer d19:1/24:0	0.878571	5.53624	0.782609	0.833333	0.727273	0.769231	0.8	0.769231	0.833333
CL 28:0_17:2_18:2_18:2	0.873214	2.21025	0.782609	0.75	0.818182	0.818182	0.75	0.818182	0.75
Cer d16:1/23:0	0.869643	5.62066	0.826087	0.666667	1	1	0.733333	1	0.666667
DG 16:0_18:2	0.867857	2.02431	0.826087	0.833333	0.818182	0.833333	0.818182	0.833333	0.833333
PE O-17:1_20:4	0.867857	2.82488	0.73913	0.916667	0.545455	0.6875	0.857143	0.6875	0.916667
SM 32:1;O2	0.866071	2.24743	0.73913	0.833333	0.636364	0.714286	0.777778	0.714286	0.833333
TG 16:0_18:2_18:3	0.864286	3.30237	0.73913	0.833333	0.636364	0.714286	0.777778	0.714286	0.833333
PE O-16:1_22:6	0.860714	2.79797	0.652174	0.916667	0.363636	0.611111	0.8	0.611111	0.916667
LPC 15:0	0.858929	1.84198	0.826087	0.75	0.909091	0.9	0.769231	0.9	0.75
GlcCer 44:4;O3	0.858929	5.49393	0.826087	0.833333	0.818182	0.833333	0.818182	0.833333	0.833333
TG 17:1_18:2_18:2	0.858929	3.57539	0.652174	0.666667	0.636364	0.666667	0.636364	0.666667	0.666667
PE O-22:2_20:4	0.857143	2.50768	0.73913	0.583333	0.909091	0.875	0.666667	0.875	0.583333
LPC 18:0	0.853571	2.39153	0.826087	1	0.636364	0.75	1	0.75	1
Cer d18:1/24:1	0.851786	4.38801	0.782609	0.75	0.818182	0.818182	0.75	0.818182	0.75
TG 15:1_18:1_18:2	0.851786	2.4204	0.782609	0.75	0.818182	0.818182	0.75	0.818182	0.75
DG 34:2	0.848214	2.58199	0.826087	0.833333	0.818182	0.833333	0.818182	0.833333	0.833333
DG 18:2_18:2	0.846429	2.37019	0.826087	0.833333	0.818182	0.833333	0.818182	0.833333	0.833333
GlcCer d18:2/24:0	0.844643	3.49202	0.782609	1	0.545455	0.705882	1	0.705882	1
PI 18:1_18:2	0.842857	2.25295	0.695652	0.666667	0.727273	0.727273	0.666667	0.727273	0.666667
SM 32:2;O2	0.835714	2.42355	0.695652	0.916667	0.454545	0.647059	0.833333	0.647059	0.916667
PE O-18:1_22:6	0.833929	3.13466	0.608696	1	0.181818	0.571429	1	0.571429	1
PE O-24:2_20:4	0.833929	2.12597	0.826087	0.916667	0.727273	0.785714	0.888889	0.785714	0.916667
TG 14:0_18:2_18:2	0.833929	2.86074	0.826087	0.833333	0.818182	0.833333	0.818182	0.833333	0.833333
SM d18:2/14:0	0.832143	2.83641	0.695652	0.916667	0.454545	0.647059	0.833333	0.647059	0.916667
PC O-16:1_22:6	0.832143	2.48339	0.478261	0.583333	0.363636	0.5	0.444444	0.5	0.583333
PE O-16:0_18:1	0.830357	2.44467	0.782609	0.833333	0.727273	0.769231	0.8	0.769231	0.833333
CL 26:0_18:2_18:2_18:2	0.830357	1.04666	0.782609	0.75	0.818182	0.818182	0.75	0.818182	0.75
TG 16:0_16:1_20:5	0.830357	2.42449	0.73913	0.666667	0.818182	0.8	0.692308	0.8	0.666667
FA 22:2	0.828571	2.19683	0.956522	0.916667	1	1	0.916667	1	0.916667
PE O-18:3_22:6	0.825	3.13291	0.565217	0.833333	0.272727	0.555556	0.6	0.555556	0.833333
Cer d18:2/23:0	0.823214	2.20521	0.826087	0.666667	1	1	0.733333	1	0.666667
TG 12:0_18:1_18:2	0.821429	3.00471	0.73913	0.916667	0.545455	0.6875	0.857143	0.6875	0.916667
DG 16:0_16:1	0.819643	2.57496	0.782609	0.916667	0.636364	0.733333	0.875	0.733333	0.916667
PE 22:4_22:5;O	0.819643	3.82608	0.565217	0.833333	0.272727	0.555556	0.6	0.555556	0.833333
PE O-16:1_18:2	0.817857	2.5603	0.652174	0.666667	0.636364	0.666667	0.636364	0.666667	0.666667
PC O-36:5	0.817857	2.25916	0.782609	0.916667	0.636364	0.733333	0.875	0.733333	0.916667
PI 38:3	0.817857	3.46261	0.695652	0.916667	0.454545	0.647059	0.833333	0.647059	0.916667
Cer d24:1/19:0	0.816071	5.68041	0.73913	0.75	0.727273	0.75	0.727273	0.75	0.75
FA 18:1	0.805357	1.90076	0.826087	0.833333	0.818182	0.833333	0.818182	0.833333	0.833333
LPC 19:0	0.803571	2.00183	0.695652	0.75	0.636364	0.692308	0.7	0.692308	0.75
PI 16:0_18:2	0.801786	2.61316	0.695652	0.666667	0.727273	0.727273	0.666667	0.727273	0.666667
PE O-17:1_18:2	0.8	1.80947	0.652174	0.5	0.818182	0.75	0.6	0.75	0.5
PE O-18:1_22:4	0.8	2.79888	0.478261	0.25	0.727273	0.5	0.470588	0.5	0.25
SM d18:1/30:6	0.798214	3.14824	0.73913	0.75	0.727273	0.75	0.727273	0.75	0.75
PE O-17:1_22:6	0.796429	3.70969	0.434783	0.75	0.0909091	0.473684	0.25	0.473684	0.75
PE O-18:0_20:4	0.794643	2.88824	0.73913	1	0.454545	0.666667	1	0.666667	1
PC O-17:1_21:4	0.794643	1.7884	0.695652	0.833333	0.545455	0.666667	0.75	0.666667	0.833333
PI 18:0_20:3	0.792857	4.00528	0.695652	1	0.363636	0.631579	1	0.631579	1
DG 16:0_18:1	0.791071	2.02597	0.73913	0.75	0.727273	0.75	0.727273	0.75	0.75
TG 12:0_16:1_18:1	0.791071	2.45158	0.826087	1	0.636364	0.75	1	0.75	1
FA 20:2	0.789286	1.93156	0.826087	0.833333	0.818182	0.833333	0.818182	0.833333	0.833333
DG 38:3	0.783929	2.2678	0.782609	0.833333	0.727273	0.769231	0.8	0.769231	0.833333
PE O-18:1_18:2	0.783929	3.29421	0.608696	0.916667	0.272727	0.578947	0.75	0.578947	0.916667
PI 16:0_20:3	0.782143	2.03636	0.652174	0.583333	0.727273	0.7	0.615385	0.7	0.583333
SM 36:3;O2	0.780357	2.16356	0.869565	1	0.727273	0.8	1	0.8	1
DG 20:1_18:2	0.778571	2.41608	0.782609	0.916667	0.636364	0.733333	0.875	0.733333	0.916667
LPC O-16:0	0.776786	2.8377	0.73913	1	0.454545	0.666667	1	0.666667	1
LPI 18:2	0.776786	2.23165	0.565217	0.416667	0.727273	0.625	0.533333	0.625	0.416667
Cer d16:1/24:1	0.771429	3.39407	0.652174	1	0.272727	0.6	1	0.6	1
LPC 22:0	0.769643	2.5091	0.695652	1	0.363636	0.631579	1	0.631579	1
DG 16:1_18:2	0.769643	2.24995	0.73913	0.75	0.727273	0.75	0.727273	0.75	0.75
DG 18:1_18:2	0.767857	2.30359	0.782609	0.833333	0.727273	0.769231	0.8	0.769231	0.833333
FA 19:2	0.764286	2.10871	0.782609	0.75	0.818182	0.818182	0.75	0.818182	0.75
PE O-19:1_20:4	0.760714	2.50426	0.73913	0.75	0.727273	0.75	0.727273	0.75	0.75
TG 12:0_16:0_18:1	0.760714	2.7792	0.73913	0.833333	0.636364	0.714286	0.777778	0.714286	0.833333
TG 14:0_16:0_18:2	0.760714	3.19366	0.73913	0.833333	0.636364	0.714286	0.777778	0.714286	0.833333
DG 18:0_18:1	0.751786	2.66088	0.695652	0.916667	0.454545	0.647059	0.833333	0.647059	0.916667
FA 16:1	0.744643	2.0518	0.826087	0.833333	0.818182	0.833333	0.818182	0.833333	0.833333
LPC 18:3	0.742857	2.6686	0.695652	0.75	0.636364	0.692308	0.7	0.692308	0.75
DG 36:1	0.739286	2.77985	0.695652	0.916667	0.454545	0.647059	0.833333	0.647059	0.916667
PE O-18:2_18:2	0.726786	2.95007	0.565217	0.75	0.363636	0.5625	0.571429	0.5625	0.75
PE O-18:1_20:3	0.721429	2.33016	0.695652	0.75	0.636364	0.692308	0.7	0.692308	0.75
LPC 18:2	0.719643	2.6392	0.73913	0.916667	0.545455	0.6875	0.857143	0.6875	0.916667
a: area under curve
b: the proportion of the number of correctly identified ESCC samples in the actual number of ESCC samples. Recall = True Positive/(True Positive + False Negative)
c: the proportion of the true predicted ESCC sample in all predicted ESCC samples. Precision = True Positive/(True Positive + False Positive)
