# Supplementary material for: Plasma-based lipidomics reveals potential diagnostic biomarkers for esophageal squamous cell carcinoma: a retrospective study
Source: PeerJ. 2024 Apr 29;12:e17272. doi: 10.7717/peerj.17272 (PMC11064858; doi:10.7717/peerj.17272)
Supplement: Table S2 [file peerj-12-17272-s007.xlsx]

## Sheet: survival_result
Supplemental table S2 Survival analysis results of the differential lipids
Lipid	p-value	HRa	HR_low	HR_high
FA.13.1	0.497059	0.673131	0.213198	2.12528
FA.14.0	0.877789	0.91496	0.29463	2.84136
FA.15.4	0.149066	2.36643	0.70877	7.90103
FA.16.1	0.0997125	0.376864	0.112737	1.25981
FA.16.0.O	0.902286	0.931518	0.300093	2.89152
FA.18.1	0.0997125	0.376864	0.112737	1.25981
FA.19.2	0.438803	0.636946	0.201395	2.01445
FA.19.1	0.525716	1.44776	0.458715	4.56929
FA.20.2	0.438803	0.636946	0.201395	2.01445
FA.21.1	0.998844	1.00084	0.322588	3.10512
FA.22.2	0.353772	0.583826	0.184679	1.84565
FA.25.0	0.855631	1.11096	0.357432	3.45304
FA.27.1	0.11047	0.388431	0.116516	1.29492
FA.28.7	0.434894	1.57486	0.49881	4.97217
FA.27.0	0.898251	1.07674	0.346586	3.34512
FA.28.0	0.487837	1.49751	0.474859	4.72253
CAR.18.2	0.0206678	0.238011	0.0637703	0.888331
LPC.14.0	0.0266262	0.252908	0.0681692	0.938288
LPC.O.16.0	0.195857	0.460649	0.138241	1.53498
LPC.15.0	0.360824	0.588859	0.186628	1.858
LPC.18.3	0.113256	0.391483	0.117562	1.30364
LPC.18.2	0.0247125	0.246962	0.0661721	0.921692
LPC.18.0	0.445474	0.641393	0.203064	2.02589
FA.36.0	0.441791	0.638731	0.201912	2.02056
LPC.19.0	0.0908482	0.368282	0.110344	1.22918
FA.39.0	0.965744	1.02513	0.330199	3.18262
LPC.22.0	0.097644	0.375593	0.112617	1.25265
DG.14.0_18.2	0.179466	0.448304	0.134671	1.49235
DG.16.0_16.1	0.102662	0.380491	0.114036	1.26954
LPI.18.2	0.494786	0.671565	0.212544	2.12191
DG.16.1_18.2	0.102662	0.380491	0.114036	1.26954
DG.16.0_18.2	0.445474	0.641393	0.203064	2.02589
DG.16.0_18.1	0.803859	0.866382	0.279067	2.68974
DG.34.2	0.445474	0.641393	0.203064	2.02589
FA.42.0	0.0407297	0.277593	0.0748079	1.03008
Cer.d18.1.24.1	0.145509	2.37885	0.71421	7.92335
DG.18.2_18.2	0.451265	1.54988	0.491177	4.89058
Cer.d18.2.23.0	0.336484	1.74657	0.552115	5.52515
DG.18.1_18.2	0.312295	0.556973	0.176149	1.76112
DG.18.0_18.1	0.803859	0.866382	0.279067	2.68974
DG.36.1	0.803859	0.866382	0.279067	2.68974
DG.37.7	0.481257	1.50709	0.477464	4.75706
FA.44.0	0.475157	1.51495	0.480527	4.77617
SM.30.1.O2	0.148809	0.423588	0.127331	1.40914
SM.31.1.O2	0.127876	0.405375	0.121866	1.34845
DG.20.1_18.2	0.0821288	0.359218	0.107737	1.19771
Cer.d16.1.23.0	0.822795	1.13814	0.366475	3.53465
DG.38.3	0.0821288	0.359218	0.107737	1.19771
SM.32.2.O2	0.0621664	0.334709	0.100165	1.11846
SM.32.1.O2	0.0908482	0.368282	0.110344	1.22918
Cer.d16.1.24.1	0.942231	1.04279	0.33577	3.23853
Cer.d24.1.19.0	0.918761	0.942773	0.303759	2.92607
SM.33.2.O2	0.852483	0.898163	0.289384	2.78764
PE.O.16.1_18.2	0.155293	0.428922	0.128898	1.42729
PE.O.16.0_18.1	0.203381	0.466254	0.139886	1.55407
PE.O.17.1_18.2	0.107853	0.386405	0.116076	1.2863
Cer.d19.1.24.0	0.918761	0.942773	0.303759	2.92607
PE.O.18.2_18.2	0.033967	0.265788	0.0714888	0.98817
PE.O.18.1_18.2	0.211301	0.472015	0.141547	1.57403
SM.36.3.O2	0.824909	1.13642	0.365742	3.53105
SM.d18.2.14.0	0.0621664	0.334709	0.100165	1.11846
PE.O.17.1_20.4	0.432745	0.633666	0.200714	2.00052
PE.O.16.1_22.6	0.952665	0.966297	0.311507	2.99746
PE.O.18.0_20.4	0.594237	0.732707	0.232264	2.31142
PE.O.18.1_20.3	0.971945	1.02053	0.328756	3.16797
PE.O.17.1_22.6	0.952665	0.966297	0.311507	2.99746
PE.O.19.1_20.4	0.524104	0.690023	0.218903	2.17508
PC.O.36.5	0.136006	0.410211	0.122463	1.37407
PE.O.18.3_22.6	0.538485	1.43135	0.453769	4.51497
SM.39.1.O2	0.964994	0.974963	0.314189	3.02542
PE.O.18.1_22.6	0.427551	1.58518	0.502854	4.99704
PE.O.18.1_22.4	0.527784	1.44472	0.458134	4.55594
CL.26.0_18.2_18.2_18.2	0.0134677	0.220028	0.0591273	0.818779
CL.28.0_17.2_18.2_18.2	0.0020828	0.129925	0.0282412	0.597729
PC.O.16.1_22.6	0.41248	0.620952	0.196569	1.96156
TG.12.0_16.1_18.1	0.102662	0.380491	0.114036	1.26954
TG.12.0_16.0_18.1	0.0266262	0.252908	0.0681692	0.938288
PC.O.17.1_21.4	0.921979	1.05822	0.34098	3.28413
SM.d18.1.23.0	0.396304	0.61132	0.19384	1.92795
PE.O.22.2_20.4	0.427551	1.58518	0.502854	4.99704
TG.12.0_18.1_18.2	0.142712	0.418529	0.12586	1.39176
TG.14.0_16.0_18.2	0.395137	0.610575	0.193592	1.92571
SM.43.1.O2	0.352552	0.583605	0.184968	1.84137
GlcCer.44.4.O3	0.317875	1.78238	0.564508	5.62767
PE.O.24.2_20.4	0.922841	0.945519	0.304281	2.93809
PI.16.0_18.2	0.0341131	0.266023	0.0715484	0.989094
TG.14.0_18.2_18.2	0.157724	0.43108	0.129601	1.43385
PE.22.4_22.5.O	0.427551	1.58518	0.502854	4.99704
TG.15.1_18.1_18.2	0.157724	0.43108	0.129601	1.43385
PI.18.1_18.2	0.473787	0.658614	0.208368	2.08176
PI.16.0_20.3	0.179466	0.448304	0.134671	1.49235
PI.18.0_18.1	0.448909	0.643928	0.204202	2.03055
GlcCer.d18.2.24.0	0.464879	1.53026	0.484787	4.83037
TG.16.0_18.2_18.3	0.538485	0.698643	0.221486	2.20376
TG.16.0_16.1_20.5	0.57778	0.722682	0.229144	2.27922
PI.18.0_20.3	0.883304	1.0885	0.35069	3.37856
SM.d18.1.30.6	0.498044	0.674048	0.213771	2.12536
TG.17.1_18.2_18.2	0.389962	0.607235	0.19246	1.9159
PI.38.3	0.541726	0.700748	0.22228	2.20914
a: Hazard Ratio
