# Supplementary material for: Plasma-based lipidomics reveals potential diagnostic biomarkers for esophageal squamous cell carcinoma: a retrospective study
Source: PeerJ. 2024 Apr 29;12:e17272. doi: 10.7717/peerj.17272 (PMC11064858; doi:10.7717/peerj.17272)
Supplement: Table S3 [file peerj-12-17272-s008.xlsx]

## Sheet: ESCC sample
Supplemental Table S3 Raw data of clinical informantion of ESCC patience
ID	Age	Gender(Male=1,Female=0)	Smoking history(Yes=1,No=0)	Drinking history(Yes=1,No=0)	Hypertension(Yes=1,No=0)	Cholesterolemia(Yes=1,No=0)	BMI	Family history of cancer(Yes=1,No=0)	pTNM（I＝1；II＝2；III＝3；IV＝4）	Status(Dead=1,Live=0)	Survival time(Day)	Survival time(Months)
219557	64	0	0	0	1	0	21.23	0	2	1	183	6.1
240080	62	1	0	1	1	0	20.66	1	2	0	1929	64.3
232728	53	1	1	0	0	0	21.77	1	2	0	2118	70.6
237974	55	1	1	1	0	0	21.51	1	2	0	1964	65.4667
239331	60	1	0	1	0	0	17.21	1	2	0	1946	64.8667
239806	69	1	1	1	1	0	18.17	0	3	1	1363	45.4333
232727	68	1	0	1	0	0	23.95	1	1	1	1537	51.2333
233504	61	1	1	1	1	0	22.84	0	1	0	2098	69.9333
237281	74	0	0	0	1	0	20.57	0	1	0	1979	65.9667
237337	66	0	0	0	0	0	19.3	0	1	1	457	15.2333
242014	75	1	1	0	0	0	19.1	1	1	0	1894	63.1333
242639	49	1	1	1	0	0	21.63	0	1	0	1880	62.6667
243636	71	1	1	1	0	0	18.37	0	1	0	1862	62.0667
244173	62	1	1	1	0	0	23.51	0	1	0	1849	61.6333
242366	66	1	0	0	0	0	21.97	0	1	0	1884	62.8
239028	47	1	1	1	1	0	27.68	0	3	0	1951	65.0333
240205	60	1	1	0	0	0	23.39	0	3	1	435	14.5
220146	72	0	0	0	0	0	26.56	0	3	1	501	16.7
231407	64	1	1	1	0	0	20.76	0	2	0	2143	71.4333
232454	72	0	0	0	1	0	16.73	0	2	1	1678	55.9333
232646	67	1	1	1	1	0	22.72	0	2	0	2112	70.4
237886	58	1	1	1	1	0	19.47	1	3	1	344	11.4667
238911	58	1	1	0	0	1	22.31	0	3	0	1951	65.0333
239289	58	1	1	1	0	0	18.75	0	3	0	1946	64.8667
239690	65	0	0	0	1	0	25.39	0	3	1	221	7.36667
239726	53	1	1	1	1	0	28.69	1	3	1	1488	49.6
239906	71	1	1	1	1	0	22.49	0	2	0	1930	64.3333
231917	48	1	1	1	0	0	19.92	0	2	1	417	13.9
239368	64	1	1	1	0	0	18.37	0	2	1	476	15.8667
240557	68	1	0	1	0	0	21.88	0	2	1	1708	56.9333
241183	64	1	1	1	0	0	20.96	0	3	0	1905	63.5
241692	49	0	0	0	0	0	23.8	0	3	0	1902	63.4
242638	59	1	1	0	1	1	23.95	1	2	0	1880	62.6667
243894	52	1	1	1	1	0	22.04	1	2	0	1855	61.8333
252330	54	1	1	1	0	1	22.48	1	3	1	450	15
252461	53	0	0	1	0	0	21.48	1	3	1	490	16.3333
252693	47	1	1	1	0	0	18.37	0	3	0	1694	56.4667
237608	55	1	0	0	0	0	22.04	0	2	0	1974	65.8
240866	62	1	1	1	1	1	21.11	0	3	1	342	11.4
239581	54	1	1	1	0	1	20.55	0	3	0	1936	64.5333

## Sheet: normal sample
ID	Age	Gender(Male=1,Female=0)
N1	64	1
N2	64	0
N3	64	1
N4	64	0
N5	63	0
N6	63	1
N7	63	0
N8	63	0
N9	62	1
N10	62	1
N11	56	1
N12	56	1
N13	56	1
N14	56	1
N15	56	1
N16	56	1
N17	58	1
N18	66	1
N19	67	1
N20	60	1
N21	65	1
N22	52	1
N23	53	1
N24	54	1
N25	60	1
N26	60	1
N27	54	1
N28	55	1
N29	55	1
N30	55	1
N31	60	1
